# Supplementary material
Source: PubMed Central journal article supplement (PMC5820959)
Supplement: IAI.00921-17_zii999092324s1.pdf [file IAI.00921-17_zii999092324s1.pdf]

**Table S1: List of antibodies and their details as used in this study.**

| <b>Target</b>              | <b>Isotype</b>                            | <b>Clone</b> | <b>Company<sup>‡</sup></b> | <b>Fluorochrome*</b> | <b>Secondary labelling</b>                    |
|----------------------------|-------------------------------------------|--------------|----------------------------|----------------------|-----------------------------------------------|
| <b>FACS analysis:</b>      |                                           |              |                            |                      |                                               |
| PD-L1                      | Rabbit polyclonal IgG                     | H-130        | SC                         | none                 | Goat anti-rabbit FITC (SC)                    |
| PD-1                       | Rabbit polyclonal IgG                     | Orb14198     | Biorybt                    | FITC                 | none<br>Goat anti-mouse AF647<br>(Invitrogen) |
| CD8                        | Mouse monoclonal IgG1<br>Mouse monoclonal | A21240       | VMRD                       | none                 | (Invitrogen)                                  |
| CD4                        | IgG2a                                     | ILA11A       | VMRD                       | none                 | Goat anti-mouse PE (Invitrogen)               |
| Macrophages                | Mouse monoclonal IgG1                     | MAC387       | Serotec®                   | APC                  | none                                          |
| <b>PBMC proliferation:</b> |                                           |              |                            |                      |                                               |
| PD-1                       | Goat Polyclonal IgG                       | TA303025     | OT                         | none                 | none                                          |
| <b>Immunofluorescence:</b> |                                           |              |                            |                      |                                               |
| PD-L1                      | Rabbit polyclonal IgG                     | H-130        | SC                         | none                 | Goat anti-rabbit FITC (SC)                    |
| CD163                      | Mouse monoclonal IgG2                     | MCA2311      | Serotec®                   | PE                   | none                                          |

<sup>‡</sup> SC= Santa Cruz Biotechnology INC. OT= OriGene Technologies, INC.

\* FITC= Fluorescein isothiocyanate, PE= Phycoerythrin, APC= Allophycocyanin
